# Supplementary material
Source: publisher figshare collection journal article supplement (https://tandf.figshare.com/articles/dataset/_/3439253)

# Supplementary Fig. 1

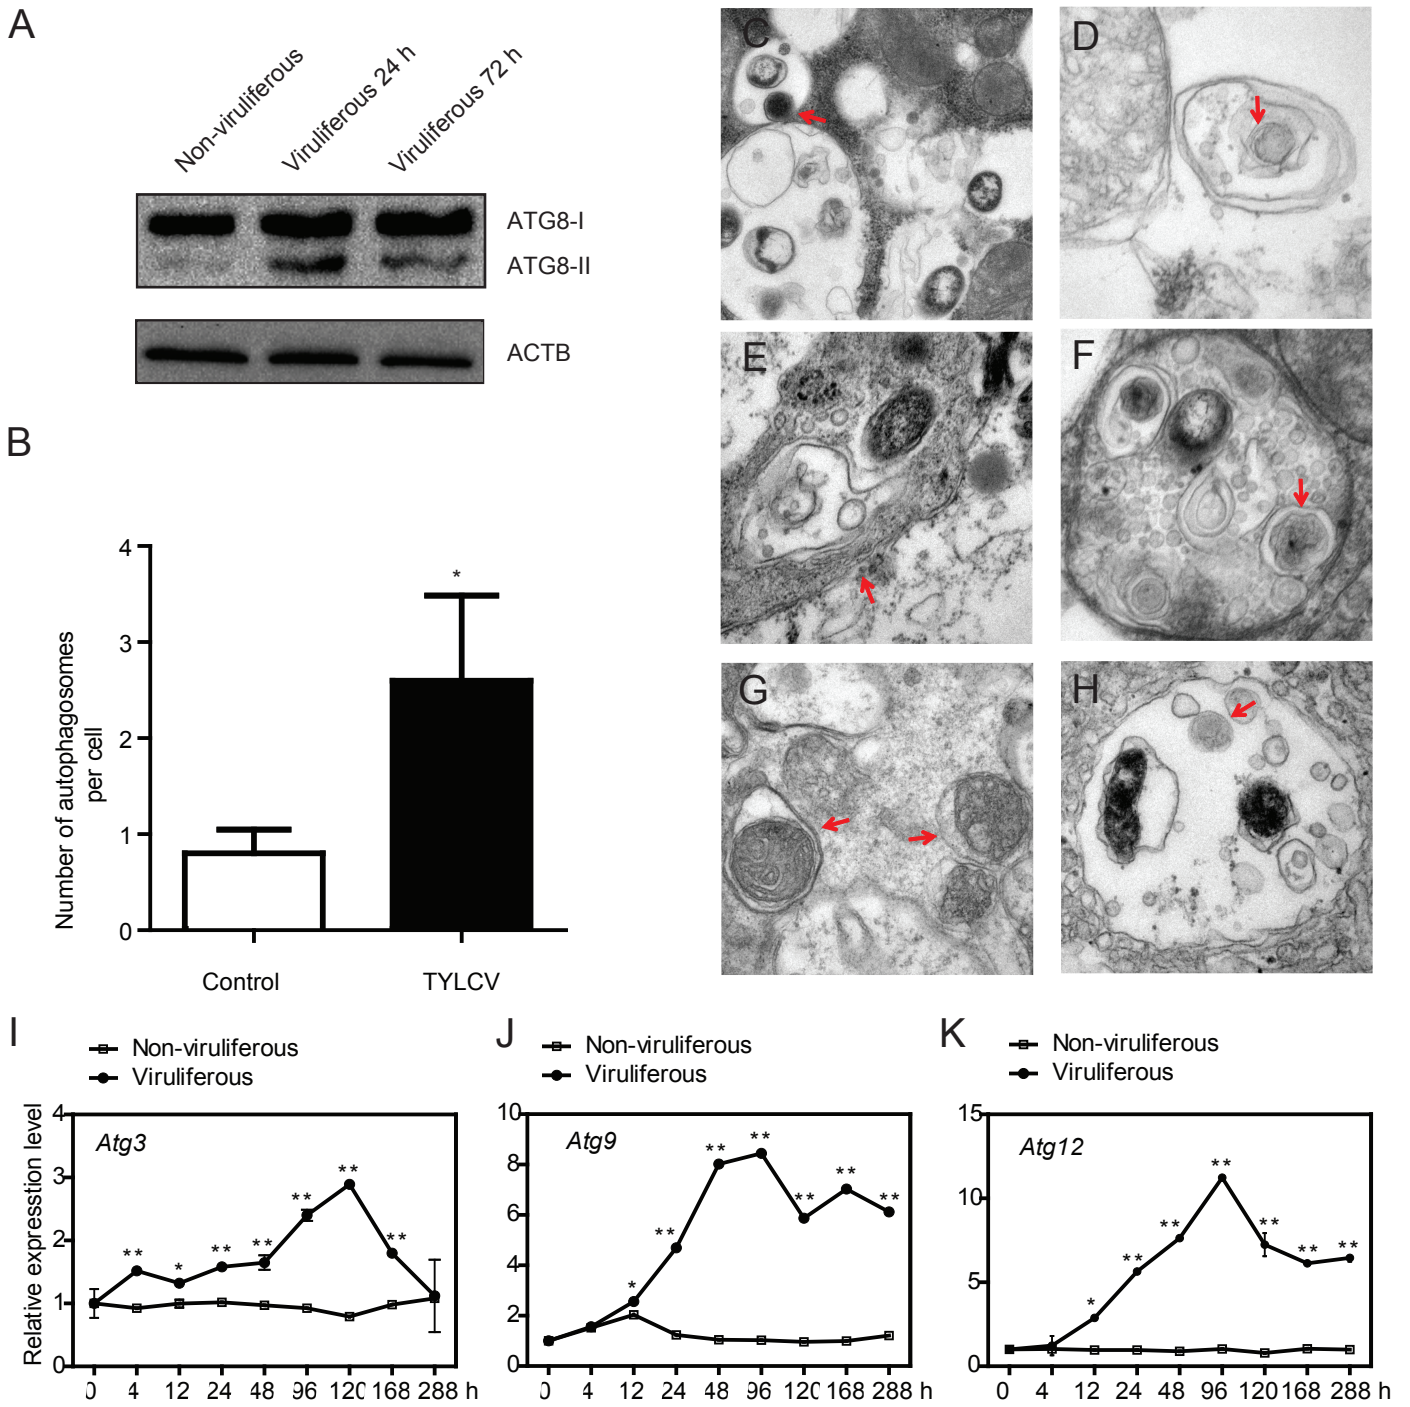

Supplement: Supplementary file 1 [file 1]

# Supplementary Fig. 2

A

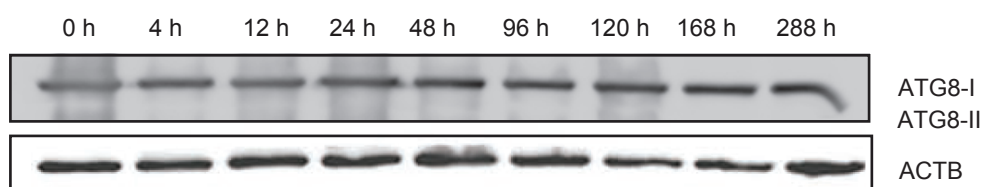

B

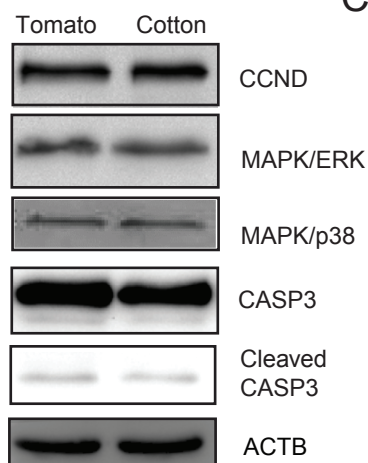

C

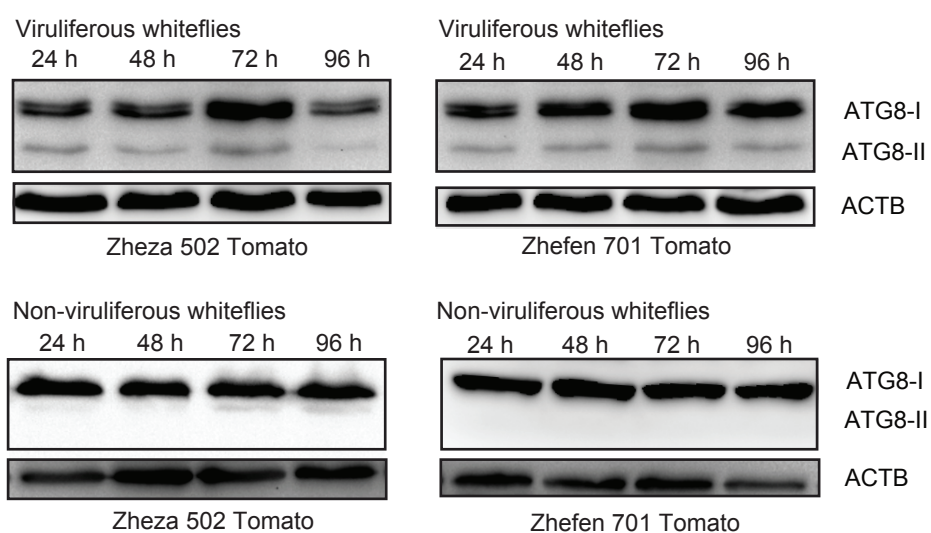

D

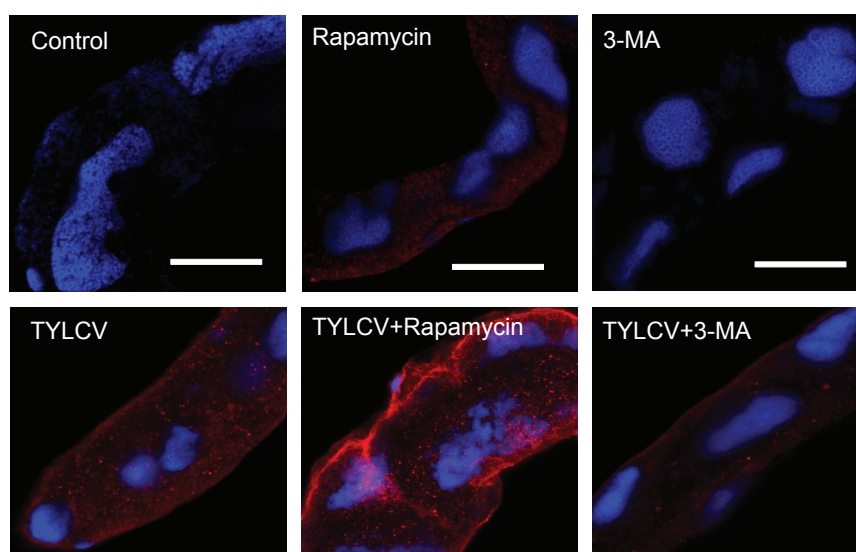

Supplement: Supplementary file 2 [file 1]

# Supplementary Fig. 3

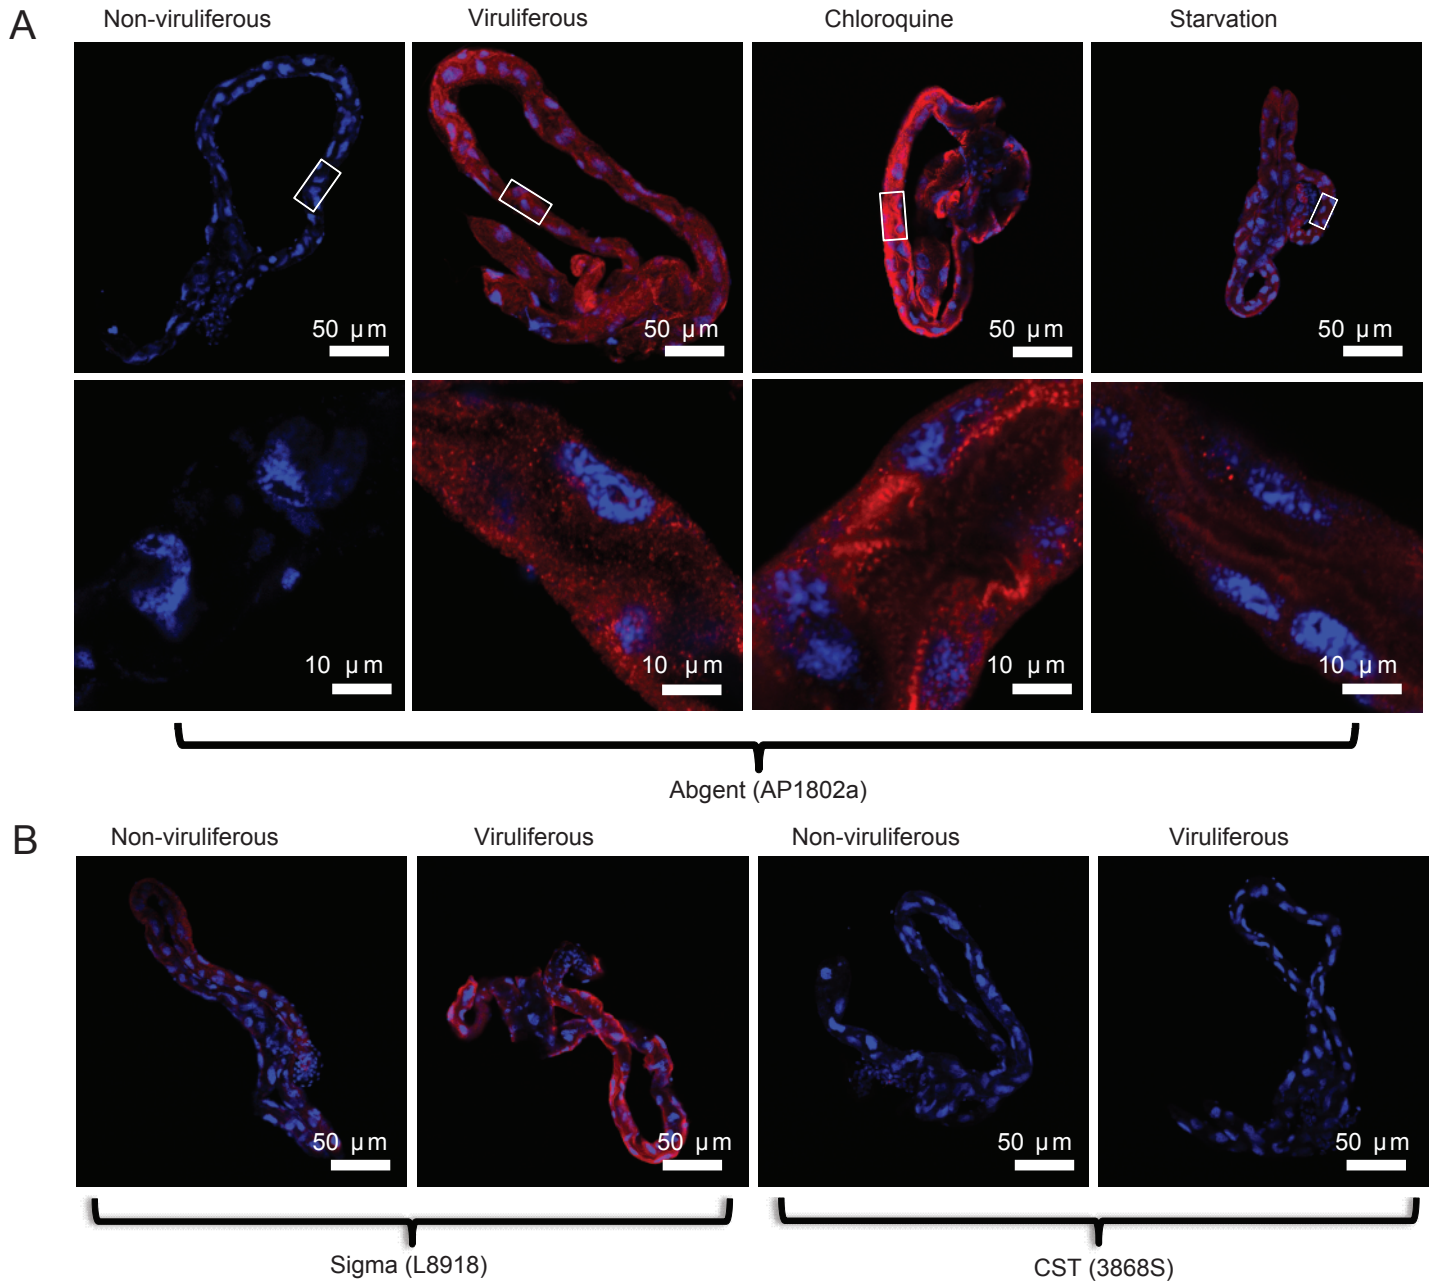

Supplement: Supplementary file 3 [file 1]
